# Supplementary material for: Robust superhydrophobic and oleophilic silk fibers for selective removal of oil from water surfaces
Source: Royal Society of Chemistry journal article supplement (doi:10.1039/c6ra14723b), 2016-01-01
Supplement: c6ra14723b1.pdf [file c6ra14723b1.pdf]

## Supplementary information

### **Robust Superhydrophobic and Oleophilic Silk Fibers for Selective Removal of Oil from Water Surface**

Manoj Patowary<sup>a</sup>, Khanindra Pathak<sup>b</sup>, Rajakumar Ananthakrishnan<sup>c,\*</sup>

<sup>a</sup> Advanced Technology Development Centre, Indian Institute of Technology Kharagpur, West Bengal 721302, India

<sup>b</sup> Department of Mining Engineering, Indian Institute of Technology Kharagpur, West Bengal 721302, India

<sup>c,\*</sup> Department of Chemistry, Indian Institute of Technology Kharagpur, West Bengal 721302, India

\* Corresponding author:

\**E-mail address*: raja.iitchem@yahoo.com

\* *Fax*: +91 3222-282252; *Tel.*: +91 3222-282322

The OSC of SFF-ODA for kerosene oil (purchased from Indian Oil Fuel Station, India), silicone oil (Loba Chemie, India), paraffin oil (Merck, India), toluene (RFCL Limited, India), hexane (SD fine-Chem Limited, India), and xylene (Universal Laboratories Private Limited, India), calculated using equation 2, have been presented in Table S1.

**Table S1:** The oil sorption capacity of SFF-ODA for some oil samples and organic solvents.

| <b>Oil/Organic solvent</b> | <b>OSC of SFF-ODA (g g<sup>-1</sup>)</b> |
|----------------------------|------------------------------------------|
| Kerosene                   | 40.30                                    |
| Silicone oil               | 49.50                                    |
| Paraffin oil               | 68.17                                    |
| Toluene                    | 49.84                                    |
| Hexane                     | 42.87                                    |
| Xylene                     | 55.24                                    |
